# Supplementary material
Source: ML conference proceedings conference paper supplement (https://openreview.net/forum?id=DnO6LTQ77U)
Supplement: supplementary_material [file attachment]

## References

- [1] Yaser S. Abu-Mostafa. Hints and the VC Dimension. *Neural Computation*, 5(2):278–288, 03 1993.
- [2] Brandon Anderson, Truong Son Hy, and Risi Kondor. Cormorant: Covariant molecular neural networks. In H. Wallach, H. Larochelle, A. Beygelzimer, F. dAlché-Buc, E. Fox, and R. Garnett, editors, *Advances in Neural Information Processing Systems*, volume 32. Curran Associates, Inc., 2019.
- [3] Fabio Anselmi, Joel Z. Leibo, Lorenzo Rosasco, Jim Mutch, Andrea Tacchetti, and Tomaso A. Poggio. Unsupervised learning of invariant representations in hierarchical architectures. *CoRR*, abs/1311.4158, 2013.
- [4] Fabio Anselmi, Lorenzo Rosasco, and Tomaso Poggio. On invariance and selectivity in representation learning. *Information and Inference: A Journal of the IMA*, 5(2):134–158, 05 2016.
- [5] Minkyung Baek, Frank Dimaio, Ivan V. Anishchenko, Justas Dauparas, Sergey Ovchinnikov, Gyu Rie Lee, Jue Wang, Qian Cong, Lisa N. Kinch, R. Dustin Schaeffer, Claudia Millán, Hahnbeom Park, Carson Adams, Caleb R. Glassman, Andy M. DeGiovanni, Jose H. Pereira, Andria V. Rodrigues, Alberdina Aike van Dijk, Ana C Ebrecht, Diederik Johannes Opperman, Theo Sagmeister, Christoph Buhlheller, Tea Pavkov-Keller, Manoj K. Rathinaswamy, Udit Dalwadi, Calvin K. Yip, John E. Burke, K. Christopher Garcia, Nick V. Grishin, Paul D. Adams, Randy J. Read, and David Baker. Accurate prediction of protein structures and interactions using a three-track neural network. *Science*, 373:871 – 876, 2021.
- [6] Peter Bartlett. Covering numbers, chaining & dudley’s entropy integral (lecture 24). class notes on statistical learning theory, 2006.
- [7] Arash Behboodi, Gabriele Cesa, and Taco S Cohen. A pac-bayesian generalization bound for equivariant networks. In S. Koyejo, S. Mohamed, A. Agarwal, D. Belgrave, K. Cho, and A. Oh, editors, *Advances in Neural Information Processing Systems*, volume 35, pages 5654–5668. Curran Associates, Inc., 2022.
- [8] Erik J. Bekkers. B-spline cnns on lie groups. In *8th International Conference on Learning Representations, ICLR 2020, Addis Ababa, Ethiopia, April 26-30, 2020*. OpenReview.net, 2020.
- [9] Alberto Bietti, Luca Venturi, and Joan Bruna. On the sample complexity of learning under geometric stability. *Advances in neural information processing systems*, 34:18673–18684, 2021.
- [10] Olivier Bousquet, Stéphane Boucheron, and Gábor Lugosi. Introduction to statistical learning theory. *Advanced Lectures on Machine Learning: ML Summer Schools 2003, Canberra, Australia, February 2-14, 2003, Tübingen, Germany, August 4-16, 2003, Revised Lectures*, pages 169–207, 2004.
- [11] Anadi Chaman and Ivan Dokmanic. Truly shift-invariant convolutional neural networks. In *Proceedings of the IEEE/CVF Conference on Computer Vision and Pattern Recognition*, pages 3773–3783, 2021.
- [12] Shuxiao Chen, Edgar Dobriban, and Jane H Lee. A group-theoretic framework for data augmentation. *The Journal of Machine Learning Research*, 21(1):9885–9955, 2020.
- [13] Taco Cohen, Maurice Weiler, Berkay Kicanaoglu, and Max Welling. Gauge equivariant convolutional networks and the icosahedral cnn. In *ICML*, 2019.
- [14] Taco Cohen and Max Welling. Group equivariant convolutional networks. In *ICML*, 2016.
- [15] Taco S. Cohen. Learning transformation groups and their invariants. Master’s thesis, University of Amsterdam, 2013.

- [16] Taco S Cohen, Mario Geiger, and Maurice Weiler. A general theory of equivariant CNNs on homogeneous spaces. In H. Wallach, H. Larochelle, A. Beygelzimer, F. dAlché-Buc, E. Fox, and R. Garnett, editors, *Advances in Neural Information Processing Systems*, volume 32. Curran Associates, Inc., 2019.
- [17] Stephan Eismann, Raphael J. L. Townshend, Nathaniel Thomas, Milind Jagota, Bowen Jing, and Ron O. Dror. Hierarchical, rotation-equivariant neural networks to select structural models of protein complexes. *Proteins: Structure*, 89:493 – 501, 2020.
- [18] Bryn Elesedy. Provably strict generalisation benefit for invariance in kernel methods. *Advances in Neural Information Processing Systems*, 34:17273–17283, 2021.
- [19] Bryn Elesedy. Group symmetry in PAC learning. In *ICLR 2022 Workshop on Geometrical and Topological Representation Learning*, 2022.
- [20] Bryn Elesedy and Sheheryar Zaidi. Provably strict generalisation benefit for equivariant models. In Marina Meila and Tong Zhang, editors, *Proceedings of the 38th International Conference on Machine Learning, ICML 2021, 18-24 July 2021, Virtual Event*, volume 139 of *Proceedings of Machine Learning Research*, pages 2959–2969. PMLR, 2021.
- [21] Marc Finzi, Gregory Benton, and Andrew G Wilson. Residual pathway priors for soft equivariance constraints. In M. Ranzato, A. Beygelzimer, Y. Dauphin, P.S. Liang, and J. Wortman Vaughan, editors, *Advances in Neural Information Processing Systems*, volume 34, pages 30037–30049. Curran Associates, Inc., 2021.
- [22] Marc Finzi, Max Welling, and Andrew Gordon Wilson. A practical method for constructing equivariant multilayer perceptrons for arbitrary matrix groups. *ArXiv*, abs/2104.09459, 2021.
- [23] Jonathan Gordon, David Lopez-Paz, Marco Baroni, and Diane Bouchacourt. Permutation equivariant models for compositional generalization in language. In *ICLR*, 2020.
- [24] B. Haasdonk, A. Vossen, and H. Burkhardt. Invariance in kernel methods by haar-integration kernels. In Heikki Kalviainen, Jussi Parkkinen, and Arto Kaarna, editors, *Image Analysis*, pages 841–851, Berlin, Heidelberg, 2005. Springer Berlin Heidelberg.
- [25] Osman Semih Kayhan and Jan C van Gemert. On translation invariance in cnns: Convolutional layers can exploit absolute spatial location. In *Proceedings of the IEEE/CVF Conference on Computer Vision and Pattern Recognition*, pages 14274–14285, 2020.
- [26] Johannes Klicpera, Janek Groß, and Stephan Günnemann. Directional message passing for molecular graphs. *ArXiv*, abs/2003.03123, 2020.
- [27] Risi Kondor and Shubhendu Trivedi. On the generalization of equivariance and convolution in neural networks to the action of compact groups. In *ICML*, 2018.
- [28] Aryeh Kontorovich and Roi Weiss. Maximum margin multiclass nearest neighbors. In *International conference on machine learning*, pages 892–900. PMLR, 2014.
- [29] Robert Krauthgamer and James R Lee. Navigating nets: Simple algorithms for proximity search. In *Proceedings of the fifteenth annual ACM-SIAM symposium on Discrete algorithms*, pages 798–807. Citeseer, 2004.
- [30] Yann André LeCun, Bernhard E. Boser, John S. Denker, Donnie Henderson, Richard E. Howard, Wayne E. Hubbard, and Lawrence D. Jackel. Backpropagation applied to handwritten zip code recognition. *Neural Computation*, 1:541–551, 1989.
- [31] Clare Lyle, Mark van der Wilk, Marta Z. Kwiatkowska, Yarin Gal, and Benjamin Bloem-Reddy. On the benefits of invariance in neural networks. *ArXiv*, abs/2005.00178, 2020.
- [32] Haggai Maron, Heli Ben-Hamu, Nadav Shami, and Yaron Lipman. Invariant and equivariant graph networks. *ArXiv*, abs/1812.09902, 2019.

- [33] Song Mei, Theodor Misiakiewicz, and Andrea Montanari. Learning with invariances in random features and kernel models. In Mikhail Belkin and Samory Kpotufe, editors, *Proceedings of Thirty Fourth Conference on Learning Theory*, volume 134 of *Proceedings of Machine Learning Research*, pages 3351–3418. PMLR, 15–19 Aug 2021.
- [34] Marvin Minsky and Seymour Papert. *Perceptrons, Expanded Edition: An Introduction to Computational Geometry*. The MIT Press, Cambridge, MA, 1987.
- [35] Behnam Neyshabur, Srinadh Bhojanapalli, David A. McAllester, and Nathan Srebro. A pac-bayesian approach to spectrally-normalized margin bounds for neural networks. *ArXiv*, abs/1707.09564, 2017.
- [36] Siamak Ravanbakhsh, Jeff G. Schneider, and Barnabás Póczos. Equivariance through parameter-sharing. In Doina Precup and Yee Whye Teh, editors, *Proceedings of the 34th International Conference on Machine Learning, ICML 2017, Sydney, NSW, Australia, 6-11 August 2017*, volume 70 of *Proceedings of Machine Learning Research*, pages 2892–2901. PMLR, 2017.
- [37] Marco Reisert and Hans Burkhardt. Learning equivariant functions with matrix valued kernels. *Journal of Machine Learning Research*, 8(15):385–408, 2007.
- [38] David W Romero and Suhas Lohit. Learning partial equivariances from data. *Advances in Neural Information Processing Systems*, 35:36466–36478, 2022.
- [39] Akiyoshi Sannai, Masaaki Imaizumi, and Makoto Kawano. Improved generalization bounds of group invariant / equivariant deep networks via quotient feature spaces. In Cassio P. de Campos, Marloes H. Maathuis, and Erik Quaeghebeur, editors, *Proceedings of the Thirty-Seventh Conference on Uncertainty in Artificial Intelligence, UAI 2021, Virtual Event, 27-30 July 2021*, volume 161 of *Proceedings of Machine Learning Research*, pages 771–780. AUAI Press, 2021.
- [40] Victor Garcia Satorras, E. Hoogeboom, F. Fuchs, I. Posner, and M. Welling. E(n) equivariant normalizing flows for molecule generation in 3d. *ArXiv*, abs/2105.09016, 2021.
- [41] Bernhard Schölkopf, Chris Burges, and Vladimir Vapnik. Incorporating invariances in support vector learning machines. In Christoph von der Malsburg, Werner von Seelen, Jan C. Vorbrüggen, and Bernhard Sendhoff, editors, *Artificial Neural Networks — ICANN 96*, pages 47–52, Berlin, Heidelberg, 1996. Springer Berlin Heidelberg.
- [42] H. Schulz-Mirbach. On the existence of complete invariant feature spaces in pattern recognition. In *Proceedings., 11th IAPR International Conference on Pattern Recognition. Vol.II. Conference B: Pattern Recognition Methodology and Systems*, pages 178–182, 1992.
- [43] Han Shao, Omar Montasser, and Avrim Blum. A theory of PAC learnability under transformation invariances. In Alice H. Oh, Alekh Agarwal, Danielle Belgrave, and Kyunghyun Cho, editors, *Advances in Neural Information Processing Systems*, 2022.
- [44] John. Shawe-Taylor. Building symmetries into feedforward networks. In *1989 First IEEE International Conference on Artificial Neural Networks, (Conf. Publ. No. 313)*, pages 158–162, 1989.
- [45] John Shawe-Taylor. Threshold network learning in the presence of equivalences. In *NIPS*, 1991.
- [46] John Shawe-Taylor. Symmetries and discriminability in feedforward network architectures. *IEEE Transactions on Neural Networks*, 4(5):816–826, 1993.
- [47] John Shawe-Taylor. Introducing invariance: a principled approach to weight sharing. In *Proceedings of 1994 IEEE International Conference on Neural Networks (ICNN’94)*, volume 1, pages 345–349 vol.1, 1994.

- [48] John Shawe-Taylor. Sample sizes for threshold networks with equivalences. *Information and Computation*, 118(1):65–72, 1995.
- [49] Jure Sokolic, Raja Giryes, Guillermo Sapiro, and Miguel Rodrigues. Generalization error of invariant classifiers. In *Artificial Intelligence and Statistics*, pages 1094–1103. PMLR, 2017.
- [50] I. Sosnovik, A. Moskalev, and A. Smeulders. Scale equivariance improves siamese tracking. *2021 IEEE Winter Conference on Applications of Computer Vision (WACV)*, pages 2764–2773, 2021.
- [51] Behrooz Tahmasebi and Stefanie Jegelka. The exact sample complexity gain from invariances for kernel regression on manifolds, 2023.
- [52] Vladimir M. Tikhomirov.  $\varepsilon$ -entropy and  $\varepsilon$ -capacity of sets in functional spaces. *Selected Works of AN Kolmogorov: Volume III: Information Theory and the Theory of Algorithms*, pages 86–170, 1993.
- [53] Raphael J. L. Townshend, Stephan Eismann, Andrew M. Watkins, Ramya Rangan, Maria Karelina, Rhiju Das, and Ron O. Dror. Geometric deep learning of rna structure. *Science*, 373:1047 – 1051, 2021.
- [54] Tycho F. A. van der Ouderaa, David W. Romero, and Mark van der Wilk. Relaxing equivariance constraints with non-stationary continuous filters. In *Advances in Neural Information Processing Systems (NeurIPS)*, volume 35, Dec 2022.
- [55] Andrea Vedaldi, Matthew Blaschko, and Andrew Zisserman. Learning equivariant structured output svm regressors. In *2011 International Conference on Computer Vision*, pages 959–966, 2011.
- [56] Ulrike von Luxburg and Olivier Bousquet. Distance-based classification with lipschitz functions. *J. Mach. Learn. Res.*, 5(Jun):669–695, 2004.
- [57] Rui Wang, Robin Walters, and Rose Yu. Approximately equivariant networks for imperfectly symmetric dynamics. In *International Conference on Machine Learning*, pages 23078–23091. PMLR, 2022.
- [58] Maurice Weiler, Patrick Forré, Erik P. Verlinde, and Max Welling. Coordinate independent convolutional networks - isometry and gauge equivariant convolutions on riemannian manifolds. *ArXiv*, abs/2106.06020, 2021.
- [59] Jennifer C. White and Ryan Cotterell. Equivariant transduction through invariant alignment. In *Proceedings of the 29th International Conference on Computational Linguistics*, pages 4651–4663, Gyeongju, Republic of Korea, Oct. 2022. International Committee on Computational Linguistics.
- [60] Marysia Winkels and Taco Cohen. Pulmonary nodule detection in ct scans with equivariant cnns. *Medical image analysis*, 55:15–26, 2019.
- [61] Jeffrey Wood and John Shawe-Taylor. Theory of symmetry network structure. Project report, 1993.
- [62] Jeffrey Wood and John Shawe-Taylor. Representation theory and invariant neural networks. *Discrete Applied Mathematics*, 69(1):33–60, 1996.
- [63] Jeffrey Wood and John Shawe-Taylor. A unifying framework for invariant pattern recognition. *Pattern Recognition Letters*, 17(14):1415–1422, 1996.
- [64] Yinshuang Xu, Jiahui Lei, Edgar Dobriban, and Kostas Daniilidis. Unified fourier-based kernel and nonlinearity design for equivariant networks on homogeneous spaces. In Kamalika Chaudhuri, Stefanie Jegelka, Le Song, Csaba Szepesvári, Gang Niu, and Sivan Sabato, editors, *International Conference on Machine Learning, ICML 2022, 17-23 July 2022, Baltimore, Maryland, USA*, volume 162 of *Proceedings of Machine Learning Research*, pages 24596–24614. PMLR, 2022.

- 567 [65] Sicheng Zhu, Bang An, and Furong Huang. Understanding the generalization ben-  
568 efit of model invariance from a data perspective. In M. Ranzato, A. Beygelzimer,  
569 Y. Dauphin, P.S. Liang, and J. Wortman Vaughan, editors, *Advances in Neural In-*  
570 *formation Processing Systems*, volume 34, pages 4328–4341. Curran Associates, Inc.,  
571 2021.
- 572 [66] Xupeng Zhu, Dian Wang, Ondrej Biza, Guanang Su, Robin Walters, and Robert Platt.  
573 Sample efficient grasp learning using equivariant models. *CoRR*, abs/2202.09468, 2022.

## 574 A Proofs

### 575 A.1 Proofs of results from Section 4

#### 576 A.1.1 Proof of Proposition 4.1

577 *Proof.* Reformulating (4.1) we find that with probability at least  $1 - \delta$  it holds that:

$$\sup_{f \in \mathcal{F}} |(P - P_n)f| \leq \mathcal{R}(\mathcal{F}_Z) + \frac{\sqrt{2\|\mathcal{F}\|_\infty \log(2/\delta)}}{\sqrt{n}}. \quad (\text{A.1})$$

578 Next, we compound the bounds for  $\mathcal{R}(\mathcal{F}_Z)$ . The optimum  $\alpha > 0$  in the first line of (4.2) is the  
 579 one for which  $\frac{n}{9} = \ln \mathcal{N}(\mathcal{F}, \alpha, \|\cdot\|_\infty)$ . Keeping in mind (4.6), we choose  $\alpha = \text{diam}(\mathcal{Z})n^{-\frac{1}{\text{ddim}\mathcal{Z}}}$   
 580 in (4.2), which gives (abbreviating  $d = \text{ddim}\mathcal{Z}$ ,  $D = \text{diam}\mathcal{Z}$ )

$$\begin{aligned} \mathcal{R}(\mathcal{F}_Z) &\lesssim D/n^{1/d} + n^{-1/2} \int_{Dn^{-1/d}}^{\infty} (D/t)^{d/2} dt = D/n^{1/d} + (D/n)^{1/2} \int_{n^{-1/d}}^{\infty} \tau^{-d/2} d\tau \\ &= \frac{D}{n^{1/d}} \left( 1 + \frac{2}{d-2} \right). \end{aligned}$$

581 Now the last equation and equation (A.1) yield the claim.  $\square$

#### 582 A.1.2 Proof of Proposition 4.2

583 We start with a preliminary result under hypotheses of strict equivariance. In this case,  
 584 we are able to use a change of variables to reduce the generalization error formula to an  
 585 equivalent one depending only on a measurable choice of  $G$ -orbit representatives of elements  
 586 from  $\mathcal{Z}$ :

587 **Proposition A.1.** *Let  $\mathcal{F}$  be a set of  $G$ -invariant functions, and let  $\mathcal{Z}^0 \subset \mathcal{Z}$  be a choice of*  
 588  *$G$ -orbit representatives for points in  $\mathcal{Z}$ , such that  $\iota^0 : \mathcal{Z} \rightarrow \mathcal{Z}^0$  associating to each  $z \in \mathcal{Z}$  its*  
 589 *orbit representative  $z^0$ , is Borel measurable. Let  $\mathcal{F}^0 := \{f|_{\mathcal{Z}^0} : f \in \mathcal{F}\}$  and denote by  $\iota^0(\mathcal{D})$*   
 590 *the image measure of  $\mathcal{D}$ . Then for each  $n \in \mathbb{N}$  if  $\{Z_i\}_{i=1}^n$  are i.i.d. samples with  $Z_i \sim \mathcal{D}$  and*  
 591  *$Z_i^0 := \iota^0 \circ Z_i$ , we have*

$$\text{GenErr}(\mathcal{F}, \{Z_i\}, \mathcal{D}) = \text{GenErr}^{(G)}(\mathcal{F}, \{Z_i\}, \mathcal{D}) = \text{GenErr}(\mathcal{F}^0, \{Z_i^0\}, \iota^0(\mathcal{D})).$$

592 *Proof.* For the first equality, we use the definition of  $\text{GenErr}$  and the change of variable  
 593 formula (3.1) and the fact that  $G$ -invariant functions  $f$  satisfy  $f(Z) = \mathbb{E}_g[f(g \cdot Z)]$ . For the  
 594 second equality, note that by hypothesis, for each  $f \in \mathcal{F}$  we have  $f(z) = f(g \cdot z)$  for all  
 595  $g \in G, z \in \mathcal{Z}$ , in particular  $f(z) = f(\iota^0(z))$  and we conclude by a change of variable by the  
 596 map  $\iota^0$  in the expectations from the definition of  $\text{GenErr}^{(G)}$ .  $\square$

597 Now the proof Proposition 4.2 combines the above idea with a simple extra step:

598 *Proof of Proposition 4.2:* The proof uses the triangular inequality. For  $f \in \mathcal{F}$  and  $g \in \text{Stab}_\epsilon$ ,  
 599 we have:

$$|Pf - P_nf| = \left| \mathbb{E}[f(Z)] - \frac{1}{n} \sum_{i=1}^n f(Z_i) \right| \leq \left| \mathbb{E}[g \cdot f(Z)] - \frac{1}{n} \sum_{i=1}^n g \cdot f(Z_i) \right| + 2\|g \cdot f - f\|_\infty.$$

600 By averaging over  $g \in \text{Stab}_\epsilon$ , we obtain the inequality in the statement of the proposition. The  
 601 equality follows by a change of variable via map  $\iota_\epsilon^0$ , exactly as in the strategy of Proposition  
 602 A.1.  $\square$

#### 603 A.1.3 Proof of Corollary 4.3 and of the more general result of Theorem A.3

604 In order to make the treatment better digestible, we first consider the intuitively simpler  
 605 case of strict equivariance, and then describe how to extend it to the more general case of  
 606 approximate and partial equivariance. In this case, if we restrict our equivariant functions to  
 607 only the space of orbit representatives  $\mathcal{Z}^0$ , the dimension counts from classical generalization  
 608 bounds of Proposition 4.1 improve as follows:

609 **Corollary A.2.** Assume that  $\mathcal{F}$  is composed of  $G$ -invariant functions and that  $d_0 :=$   
610  $\text{ddim}(\mathcal{Z}^0) > 2$ . Also, denote  $D_0 := \text{diam}(\mathcal{Z}^0)$ . With the same notation as in Proposition A.1  
611 and with the hypotheses of Proposition 4.1, for any probability distribution  $\mathcal{D}$  over  $\mathcal{Z}$ , the  
612 following holds with probability at least  $1 - \delta$ :

$$\text{GenErr}(\mathcal{F}, \{Z_i\}, \mathcal{D}) \lesssim \frac{d_0}{d_0 - 2} \left( \frac{D_0^{d_0}}{n} \right)^{1/d_0} + n^{-1/2} \sqrt{\|\mathcal{F}\|_\infty \log(2/\delta)}.$$

613 *Proof.* Due to Proposition A.1, we only need to bound  $\text{GenErr}(\mathcal{F}^0, \{Z_i^0\}, \iota^0(\mathcal{D}))$ . Thus it  
614 suffices to apply Proposition 4.1 for the above function. We note that  $\|\mathcal{F}^0\|_\infty \leq \|\mathcal{F}\|_\infty$  to  
615 conclude.  $\square$

616 The drawback of the above Corollary, is that it leaves open the question of *how to actually*  
617 *bound* the diameter and dimension of  $\mathcal{Z}^0$ , on which we do not have direct control. The next  
618 steps we take consist precisely in translating the information from properties of  $G$  to relevant  
619 properties of  $\mathcal{Z}^0$ .

620 A first, simpler, approach could be the following. Under the reasonable assumption that  $\mathcal{Z}, \mathcal{Z}^0$   
621 have diameter greater than 1, the leading term on the left in Corollary A.2 is  $n^{-1/d_0}$ . Thus  
622 the optimal choices of  $\mathcal{Z}^0$  are those which minimize the doubling dimension  $d_0 = \text{ddim}(\mathcal{Z}^0)$   
623 amongst sets of representatives of  $G$ -orbits. This is a weak regularity assumption, implying  
624 that we want  $\mathcal{Z}^0$  to not oscillate wildly. The effect of  $G$  on coverings is evident in case  $G$ ,  
625  $\mathcal{Z}^0$  are manifolds, and  $\mathcal{Z} = \mathcal{Z}^0 \times G$  (see (A.3) for the strictly equivariant case, and the more  
626 general (A.5) for the general case). Since  $\text{ddim}$  coincides with topological dimension, we  
627 immediately have

$$d_0 = d - \dim(G).$$

628 Intuitively, the dimensionality of  $G$  can be understood as eliminating degrees of freedom  
629 from  $\mathcal{Z}$ , and it is this effect that improves generalization by  $n^{-1/(d - \dim(G))} = n^{-1/d}$ .

630 In order to include more general situations, we now describe a second, more in-depth approach.  
631 We take a step back and rather than addressing direct diameter and dimension bounds  
632 for  $\mathcal{Z}^0$ , we go "back to the source" of Proposition 4.1. We update the bounds on covering  
633 numbers of  $\mathcal{Z}^0$ , directly in terms of the  $G$ -action and of  $\mathcal{Z}$ . The ensuing framework is robust  
634 enough to later include, after a few adjustments, also the cases of partial and approximate  
635 equivariance. Here is our fundamental bound, which generalizes and extends [49, Thm.3].

636 **Theorem A.3.** Assume that  $\mathcal{Z}$  is a metric space with distance  $d$  and  $S \subset G$  is a subset of a  
637 metric group  $G$  consisting of transformations  $g : \mathcal{Z} \rightarrow \mathcal{Z}$  (with action denoted  $g \cdot z := g(z)$ )  
638 for which there exists a choice of  $S$ -orbit representatives  $\mathcal{Z}_0 \subset \mathcal{Z}$  and a distance function  
639  $d_G$  on  $S$  satisfying the following for  $L, L' \in (0, +\infty]$  (with the conventions  $1/+\infty := 0$  and  
640  $\mathcal{N}(X, 0) := +\infty, \mathcal{N}(X, +\infty) := 0$ ):

- 641 1. For all  $z_0, z'_0 \in \mathcal{Z}_0$  and all  $g \in S$  it holds that  $\frac{1}{L}d(z_0, z'_0) \leq d(g \cdot z_0, g \cdot z'_0) \leq L'd(z_0, z'_0)$ .
- 642 2. For all  $g, g' \in S$  and  $z_0, z'_0 \in \mathcal{Z}_0$  it holds that  $\frac{1}{L}d_G(g, g') \leq d(g \cdot z_0, g' \cdot z'_0) \leq$   
643  $L'd_G(g, g')$ .

644 Then for each  $\delta' > 0$  the following holds

$$\mathcal{N}(\mathcal{Z}_0, 2\delta' L) \mathcal{N}(S, 2\delta' L) \leq \mathcal{N}(\mathcal{Z}, \delta') \leq \mathcal{N}(\mathcal{Z}_0, \delta'/2L') \mathcal{N}(S, \delta'/2L'). \quad (\text{A.2})$$

645 Before the proof, we observe how Corollary 4.3 can be recovered using the choice  $L > 0, L' =$   
646  $+\infty$  in Theorem A.3:

647 *Proof of Corollary 4.3:* We apply Theorem A.3 to  $S = \text{Stab}_\epsilon$  and  $\mathcal{Z}_0 = \mathcal{Z}_\epsilon^0$  as in the corollary  
648 statement. Then we take  $\delta = 2L\delta'$  in the conclusion (A.2), and consider only the lower  
649 bound inequality, which directly gives the claim of the corollary.  $\square$

650 *Proof of Theorem A.3:* In this proof, we will denote a minimal  $\alpha$ -ball cover of a metric space  
651  $X$  by  $X_\alpha$ .

Note that we are not assuming  $G$  to be a group, but due to lower bound in property 1. it follows that  $z_0 \mapsto g \cdot z_0$  is injective (for  $z_0 \neq z'_0$  we have  $d(z_0, z'_0) > 0$  and thus  $g \cdot z_0 \neq g \cdot z'_0$ ), and when below we write " $g^{-1}$ " this has to be interpreted as the inverse of the  $g$ -action, restricted to its image.

Further, note that the case when one of  $L, L'$  is  $+\infty$ , corresponds to removing the part of the assumptions (and of the conclusions) involving that value, thus we only consider the case of finite  $L'$  and finite  $L$ .

On fixing an arbitrary point  $z \in \mathcal{Z}$ , we can write  $z = g \cdot z_0$  for a suitable  $g \in G, z_0 \in \mathcal{Z}^0$ . Let  $\eta := \delta'/2L'$ . For fixed covers  $\mathcal{Z}_\eta^0, G_\eta$ , there exists a point  $z'_0 \in \mathcal{Z}_\eta^0$  with  $d(z'_0, z_0) < \eta$  and  $g' \in G_\eta$  with  $d_G(g', g) < \eta$ . Thus by property 1. we have  $d(g \cdot z'_0, z) < L'\eta = \epsilon/2$  and by property 2. we have  $d(g' \cdot z'_0, g \cdot z'_0) < L'\eta = \delta'/2$ . By the triangle inequality,  $d(g' \cdot z'_0, z) < \delta'$  and thus  $G_\eta \cdot \mathcal{Z}_\eta^0$  is an  $\delta'$ -cover of  $\mathcal{Z}$ . Thus we have

$$\mathcal{N}(\mathcal{Z}, \delta') \leq \#G_{\delta'/2L'} \# \mathcal{Z}_{\delta'/2L'}^0,$$

optimizing over the cardinalities on the right hand side yields the second inequality in (A.2).

Now consider an  $\delta'$ -cover  $\mathcal{Z}_{\delta'}$  of  $\mathcal{Z}$ , and for  $\eta = 2\delta L$  consider an  $\eta$ -cover  $G_\eta$  of  $G$ . We find that for each  $z \in \mathcal{Z}_{\delta'}$ , there exists at most one  $g \in G_\eta$  such that  $\text{dist}(z, g \cdot \mathcal{Z}_0) < \eta/2L = \delta'$ . Notice that if this were false, we could use the triangle inequality and contradict property 2. in the statement. For each  $g \in G_\eta$  denote  $Z_g$  the set of such points  $z \in \mathcal{Z}_{\delta'}$  such that there exists  $x \in g \cdot \mathcal{Z}^0$ , and assign exactly one such  $x = x(z)$  to each  $z$ , forming a set  $X_g$  of all such  $x(z)$ . Any other point  $x' \in g \cdot \mathcal{Z}^0$  such that  $d(x', z) < \delta'$  then satisfies  $d(x', x) < 2\delta'$  by triangle inequality, and thus  $X_g$  is a  $2\delta'$ -cover of  $g \cdot \mathcal{Z}_0$ . If for  $g \cdot z_0 \in g \cdot \mathcal{X}_0$  the point  $x \in g \cdot \mathcal{X}_0$  satisfies  $d(g \cdot z_0, x) < 2\delta'$ , then by property 1. in the statement we have  $d(z_0, g^{-1} \cdot x) < 2\delta' L$ , and thus  $g^{-1} \cdot X_g$  is a  $2\delta' L$ -cover of  $\mathcal{Z}_0$ , having the same cardinality as  $X_g$ . We then compute as follows, proving the first inequality in (A.2):

$$\mathcal{N}(\mathcal{Z}, \delta') \geq \sum_{g \in G_\eta} \#Z_g = \sum_{g \in G_\eta} \#(g^{-1} \cdot X_g) \geq \mathcal{N}(G, 2\delta' L) \mathcal{N}(\mathcal{Z}_0, 2\delta' L).$$

□

#### A.1.4 Proof of Theorem 4.4

As before, we focus again first on the exact equivariance case, where Theorem A.4 is the direct analogue to (or special case of) Theorem 4.4.

Under the hypotheses of Theorem A.3 on the  $G$ -action, we directly obtain the following, for the strictly equivariant case:

$$\mathcal{N}(\mathcal{Z}_0, \delta) \leq \frac{\mathcal{N}(\mathcal{Z}, \delta/2L)}{\mathcal{N}(G, \delta)}. \quad (\text{A.3})$$

We next impose that for  $\delta \lesssim \text{diam}(G)$  the group  $G$  satisfies the natural "volume growth" assumption, where for compact groups  $\text{Vol}(G)$  is its  $\text{dim}(G)$ -dimensional Hausdorff measure and  $\text{dim}(G)$  is the usual Hausdorff dimension, and for finite groups we use minimum separation notation  $\delta_G > 0$  as defined in (4.4):

$$\textbf{Assumption: } \mathcal{N}(G, \delta) \gtrsim \begin{cases} \#G/(\max\{\delta, \delta_G\})^{\text{ddim}(G)}, & \text{if } G \text{ finite,} \\ \text{Vol}(G)/\delta^{\text{dim}G}, & \text{if } \text{dim}G > 0. \end{cases} \quad (\text{A.4})$$

Similarly to Proposition 4.1, we then get the following, in which the leading term in the bound has exponent figuring  $d_0 = \text{ddim}(\mathcal{Z}) - \text{dim}(G)$ . Recall that  $\text{dim}(G) = 0$  for finite groups, thus the distinction can be made directly in terms of the dimension of  $G$ .

**Theorem A.4.** *Let  $\delta > 0$  be fixed. Assume that for a given ambient group  $G$  the group  $G$  satisfies assumption (A.4) and that its action satisfies the the assumptions 1. and 2. of Theorem A.3 for some finite  $L > 0$  and  $L' = +\infty$ . We denote  $d_G = \text{ddim}(G)$  if  $G$  is a discrete group and  $d_G = \text{dim}(G)$  if  $G$  is compact and non-discrete, and  $d = \text{ddim}(\mathcal{Z})$ . Furthher assume  $d_0 := d - d_G > 2$ . Furthermore, set  $|G| := \text{Vol}(G)$  if  $\text{dim}G > 0$  and  $|G| := \#G$  for finite  $G$ . Then with the notations of Proposition 4.1 we have with probability  $\geq 1 - \delta$*

$$\text{GenErr}(\mathcal{F}, \{Z_i\}, \mathcal{D}) \lesssim n^{-1/2} \sqrt{\|\mathcal{F}\|_\infty \log(2/\delta)} + (E),$$



694 where

$$(E) := \begin{cases} \frac{d_0}{d_0-2} \delta_G^{-d_0/2+1} \left( \frac{(2L)^d D^d}{|G|n} \right)^{1/2} & \text{if } G \text{ is finite and } (2L)^d D^d < |G|n \delta_G^{d_0}, \\ \frac{d_0}{d_0-2} \left( \frac{(2L)^d D^d}{|G|n} \right)^{1/d_0} & \text{otherwise.} \end{cases}$$

695 *Proof.* We follow the same computation as Proposition 4.1, but use Proposition A.1 in order  
 696 to reduce to restrictions of functions to  $\mathcal{Z}^0$ . In this case, using (A.3) and assumption (A.4),  
 697 and with notation as in our statement, we will have:

$$\mathcal{N}(\mathcal{Z}_0, t) \lesssim \frac{(2L)^d D^d}{|G|} \max\{\delta_G, t\}^{-d_0},$$

698 where we have  $\delta_G = 0$  for  $\dim G > 0$ . We set  $C := \frac{(2L)^d D^d}{|G|}$  for simplicity of notation. In case  
 699  $C\delta_G^{d_0} < 1$  (which includes the case  $\dim G > 0$ ), we take  $\alpha = (C/n)^{1/d_0}$  in the Dudley integral  
 700 (4.2) and find

$$\mathcal{R}(\mathcal{F}_{\mathcal{Z}^0}) \lesssim \alpha + n^{-1/2} \int_{\alpha}^{\infty} \sqrt{Ct^{-d_0}} dt,$$

701 from which the proof goes exactly as in Proposition 4.1, with  $C$  replacing  $D^d$ , and we get  
 702 the second option for the value of  $(E)$  as given in our statement. In case  $C\delta_G^{d_0} < 1$  instead  
 703 we take  $\alpha = 0$  and our above bound for  $\mathcal{N}(\mathcal{Z}_0, t)$  plugged into (4.2) (recalling the notation  
 704 for  $C$ ):

$$\mathcal{R}(\mathcal{F}_{\mathcal{Z}^0}) \lesssim \int_0^{\infty} \sqrt{C \max\{\delta_G, t\}^{-d_0}} dt = \delta_G^{-d_0/2+1} \sqrt{C/n} + \sqrt{C/n} \int_{\delta_G}^{\infty} t^{-d_0/2} dt,$$

705 from which the second case of the value of  $(E)$  follows by direct computation.  $\square$

706 Now the proof of Theorem 4.4 proceeds in exactly the same manner as the above. Below we  
 707 explain the required adaptations:

708 *Proof of Theorem 4.4:* The following updates are the principal adaptations required for the  
 709 above proof of Theorem A.4:

- 710 • The role of  $G$  should be replaced by  $\text{Stab}_{\epsilon}$ , except for the fact that parameters  $\delta_G, d_G$   
 711 remain unchanged (i.e. we use their values corresponding to "ambient" group  $G$   
 712 rather than those for  $\text{Stab}_{\epsilon}$ ).
- 713 • The  $G$ -orbit representative set  $\mathcal{Z}^0$  then should be replaced by representatives  $\mathcal{Z}_{\epsilon}^0$  for  
 714 orbits of  $\text{Stab}_{\epsilon}$ .

715 With these changes, assumption (A.4) implies its more general version, assumption (4.7).  
 716 Indeed,  $|G|$  equals  $\#G$  for finite  $G$  and  $\text{Vol}(G)$  for compact  $G$ , and  $\delta_G > 0$  only in the first  
 717 case. Furthermore, we have  $\delta_{\text{Stab}_{\epsilon}} \geq \delta_G$  as a direct consequence of  $\text{Stab}_{\epsilon} \subseteq G$ .

718 We observe that Corollary 4.3 (which also is obtained from Theorem A.3 with the above two  
 719 main substitutions) directly gives the version of Theorem (A.3) required to get the correct  
 720 replacement of (A.3) under our initially declared two substitutions. We get:

$$\mathcal{N}(\mathcal{Z}_{\epsilon}^0, \delta) \leq \frac{\mathcal{N}(\mathcal{Z}, \delta/2L)}{\mathcal{N}(\text{Stab}_{\epsilon}, \delta)}. \quad (\text{A.5})$$

721 With the above changes, the proof follows by exactly the same steps as in the above proof of  
 722 Theorem A.4.  $\square$

723 *Remark A.5.* Note that, as might be evident from the last proof, we could have introduced  
 724 new more precise parameters to keep track of dimensionality and minimum separation for  
 725  $\text{Stab}_{\epsilon}$  rather than formulating assumption (4.7) in terms of  $d_G, \delta_G$ . This is justified for the  
 726 aims of this work. Indeed, all the main situations of interest to us are those in which  $\text{Stab}_{\epsilon}$   
 727 is a "large" subset of  $G$ , i.e. it has dimension  $d_G$ , and in all our examples for finite groups  
 728  $\delta_G > 0$ , the minimum separation for  $\text{Stab}_{\epsilon}$  is within a small factor of  $\delta_G$  itself.

## 729 A.2 Proof of Proposition 5.1

730 *Proof.* We have that  $Z = (X, Y)$  is a data distribution in which by our assumption 2.  
 731 preceding the proposition, we have that almost surely  $Y = y^*(X)$  for a deterministic function  
 732  $y^*$ . With this notation, we may write

$$\mathbb{E}_Z[f(Z)] = \mathbb{E}_{X_\epsilon^0} \mathbb{E}_{g|X_\epsilon^0}[f(g \cdot X_\epsilon^0, y^*(g \cdot X_\epsilon^0))].$$

733 Recalling that we restrict to functions of the form  $f(x, y) = \ell(\tilde{f}(x), y) = d_Y(\tilde{f}(x), y)^2$ , we  
 734 first consider the precise equivariance case  $\epsilon = 0$ . In this case for  $g \in \text{Stab}_\epsilon(\mathcal{F})$  we find also  
 735  $\tilde{f}(g \cdot X_\epsilon^0) = g \cdot \tilde{f}(X_\epsilon^0)$  and thus when optimizing over  $\tilde{f}$  we have to determine the optimal  
 736 value of  $y = \tilde{f}(X_\epsilon^0)$  to be associate to each  $X_\epsilon^0$ . Thus as a consequence of all the above, if  $\tilde{\mathcal{F}}$   
 737 would be the class of all precisely  $\text{Stab}_\epsilon$ -equivariant measurable functions, we would get the  
 738 following rewriting:

$$\text{AppGap}(\mathcal{F}, \mathcal{D}) = \min_{\tilde{f} \in \tilde{\mathcal{F}}} \mathbb{E}_Z[d_Y(\tilde{f}(X), y^*(X))] = \mathbb{E}_{X_\epsilon^0} \min_{y \in \mathcal{Y}} \mathbb{E}_{g|X_\epsilon^0} [d_Y(g \cdot y, y^*(g \cdot X_\epsilon^0))^2]. \quad (\text{A.6})$$

739 For  $\epsilon > 0$ , for each fixed  $X_\epsilon^0 = x_\epsilon^0$  we may further perturb the associated  $y = \tilde{f}(x_\epsilon^0)$  by at most  
 740  $\epsilon$  in the direction of  $y^*(X_\epsilon^0)$ , while still obtaining a measurable function with approximation  
 741  $\ell_\infty$ -norm error bounded by  $\epsilon$ , thus the above bound is improved to

$$\text{AppErr}(\mathcal{F}, \mathcal{D}) \leq \mathbb{E}_{X_\epsilon^0} \min_y \mathbb{E}_{g|X_\epsilon^0} \left[ (d_Y(g \cdot y, y^*(g \cdot X_\epsilon^0)) - \epsilon)_+^2 \right], \quad (\text{A.7})$$

742 as desired. In case  $\tilde{\mathcal{F}}$  contains a strict subset of measurable invariant functions with error  $\epsilon$ ,  
 743 we would only get an inequality instead of the first equality in (A.6) but we still have the  
 744 same bound as in (A.7), and thus the proof is complete.  $\square$

## 745 A.3 Proof of Theorem 5.2

746 *Proof.* We use the isodiametric inequality (5.1) in  $G$ , applying it to  $\text{Stab}_\epsilon(\mathcal{F})$  for  $\mathcal{F} \in \mathcal{C}_{\epsilon, \lambda}$ .  
 747 Then by taking  $\text{Stab}_\epsilon(\mathcal{F}) = X$  which is optimal for inequality (5.1) we can saturate the two  
 748 bounds (modulo discretization errors for discrete  $G$ ) and we get

$$\frac{|\text{Stab}_\epsilon(\mathcal{F})|}{|G|} \simeq \lambda, \quad \text{diam}(\text{Stab}_\epsilon(\mathcal{F})) \simeq C_G \lambda^{1/\text{ddim}(G)}.$$

749 We next use Lipschitz deformation bounds and find that for all  $x \in \mathcal{X}$  we have

$$\begin{aligned} \text{diam} \{y^*(g \cdot x) : g \in \text{Stab}_\epsilon(\mathcal{F})\} &\leq \text{diam}(\text{Stab}_\epsilon(\mathcal{F})) \text{Lip}(y^*) L' \\ &\leq C_G \lambda^{1/\text{ddim}(G)} \epsilon(\mathcal{F}) \text{Lip}(y^*) L'. \end{aligned}$$

750 Then we use Proposition 5.1 for  $\mathcal{F}$  and observe that when  $g, X_\epsilon^0$  are random variables as  
 751 in the proposition, in particular  $g \in \text{Stab}_\epsilon(\mathcal{F})$  and for each  $X_\epsilon^0 = x_\epsilon^0$  we find the following  
 752 estimate valid uniformly over  $y \in \{y^*(g \cdot X_\epsilon^0) : g \in \text{Stab}_\epsilon(\mathcal{F})\}$ :

$$d_Y(y, y^*(g \cdot x_\epsilon^0)) \leq C'_G \lambda^{1/\text{ddim}(G)} \text{Lip}(y^*) L'.$$

753 In a similar way, we also find

$$d_Y(y, g \cdot y) \leq C'_G \lambda^{1/\text{ddim}(G)} L'.$$

754 By triangle inequality, and using the assumption that  $\text{Lip}(y^*) \simeq 1$  it follows that

$$d_Y(y, y^*(g \cdot x_\epsilon^0)) \leq C'_G \lambda^{1/\text{ddim}(G)} (1 + \text{Lip}(y^*)) L' \lesssim C'_G \lambda^{1/\text{ddim}(G)} \text{Lip}(y^*) L'.$$

755 Then we may perturb each  $y$  by  $\epsilon$  in order to possibly diminish this value without violating  
 756 the condition defining  $\text{Stab}_\epsilon(\mathcal{F})$ , and with these choices we obtain the claim.  $\square$

#### 757 A.4 Finding the optimal $\lambda = \lambda^*$ for the bound of Theorem 6.1

758 We note that  $\lambda^*$  minimizing  $C\lambda^\alpha + C'\lambda^{-\beta}$  for  $\alpha, \beta > 0$  is given by

$$\lambda^* = \left( \frac{\beta C'}{\alpha C} \right)^{1/(\alpha+\beta)}.$$

759 recall that in our case have the following choices, for case 1 and case 2 in the theorem's  
760 statement.

$$\alpha_1 = \alpha_2 = 1/d_G, \quad \beta_1 = 1/2, \beta_2 = 1/d_0,$$

761 and

$$\begin{aligned} C &= C_G \text{Lip}(y^*) L', \\ C'_1 &\simeq \frac{(2LD)^{d/2} |G|^{1/2}}{\delta_G^{(d_0-2)/2}}, \\ C'_2 &\simeq (2LD)^{d/d_0} |G|^{1/d_0}, \end{aligned}$$

762 and thus the optimal choice of  $\lambda$  is

$$\begin{aligned} \text{in case } n\lambda \geq C_3, \quad \lambda^* &= \left( \frac{2}{d_G} \frac{(2LD)^{d/2} |G|^{1/2}}{\delta_G^{(d_0+2)/2}} \right)^{2d_G/(d_G+2)} n^{-d_G/(d_G+2)}, \\ \text{in case } n\lambda > C_3, \quad \lambda^* &= \left( \frac{d_0}{d_G} (2LD)^{d/d_0} |G|^{1/d_0} \right)^{d_0 d_G/(d_0+d_G)} n^{-d_G/(d_G+2)}. \end{aligned}$$

## 763 B Examples

764 We describe some concrete examples of partial and approximate equivariance using the  
765 language we used in section 3.2 while sourcing them from existing literature. But first, we  
766 expand a little on our equivariance error notation.

### 767 B.1 Equivariance error notation

768 Recall that the action of elements of an ambient group  $G$  over the product space  $\mathcal{Z} = \mathcal{X} \times \mathcal{Y}$   
769 may be written as follows: For coordinates  $z = x \times y$  we may write  $g \cdot z = (g \cdot x, g \cdot y)$ , and  
770 thus for  $\tilde{f} : \mathcal{X} \rightarrow \mathcal{Y}$  and  $f(x, y) = \ell(\tilde{f}(x), y)$ , we have the action

$$(g \cdot f)(z) := f(g \cdot z) = \ell(\tilde{f}(g \cdot x), g \cdot y).$$

771 For the equivariance error of  $g, f$ , interpreted as "the error of  $f$ 's approximate equivariance  
772 under the action by  $g$ ", we get the following, which is valid in the common situations in  
773 which  $\ell(y, y') \geq 0$  in general with  $\ell(y, y) = 0$  for all  $y \in \mathcal{Y}$ :

$$\text{ee}(f, g) := \|g \cdot f - f\|_\infty = \sup_{x, y} \left| \ell(\tilde{f}(g \cdot x), g \cdot y) - \ell(\tilde{f}(x), y) \right| \geq \sup_x \ell(\tilde{f}(g \cdot x), g \cdot \tilde{f}(x)), \quad (\text{B.1})$$

774 where the last inequality follows by restricting the supremum from  $\mathcal{X} \times \mathcal{Y}$  to the graph of  $\tilde{f}$ ,  
775 namely by imposing  $y = \tilde{f}(x)$ .

776 In several recent works, the equivariance error is defined simply by comparing  $g \cdot \tilde{f}(x)$  and  $\tilde{f}(g \cdot$   
777  $x)$ , as in the rightmost term of (B.1), thus it is lower than the one found here. We provide a  
778 justification for our definition of the equivariance error:

- 779 • The loss  $\ell$  is the integrative part of the model, thus a definition for equivariance  
780 error which does not include it will only detect partial information concerning the  
781 influence of symmetries.
- 782 • The notion of equivariance error defined via  $\ell$  simplifies the comparison between  $\tilde{f}$   
783 and data distributions  $\mathcal{D}$ .

## 784 B.2 Examples

### 785 B.2.1 Imperfect translation equivariance in classical CNNs

786 We consider here the most common examples of group equivariant convolutional networks  
 787 (GCNNs), which are the usual Convolutional Neural Networks (CNNs) for computer vision  
 788 tasks. We follow observations from [25] and [11], and connect the underlying ideas to  
 789 Theorem 6.1.

790 **Setting of the problem.** We consider a usual CNN layer, keeping in mind a segmentation  
 791 task, where both  $\mathcal{X} = \mathcal{Y}$  represent spaces of images. More precisely, we think of images  
 792 as pixel values at integer-coordinate positions taken from the index set  $\mathbb{Z} \times \mathbb{Z}$ . We also  
 793 assume that the relevant information of each image only comes from a square of size  $n \times n$   
 794 pixels, outside which the pixel values are taken to be 0. We consider the application of a  
 795 single convolution kernel/filter, of  $k \times k$  pixels (with  $k$  a small odd number). One typically  
 796 applies padding by a layer of 0's of size  $(k - 1)/2$  on the perimeter of the  $n \times n$  square, after  
 797 which convolution with the kernel is computed on the  $n \times n$  central pixels of the resulting  
 798  $(n + k - 1) \times (n + k - 1)$  padded input image. The output relevant information is restricted  
 799 to a  $n \times n$  square, outside which pixel values are set to 0 again, via padding.

800 **Metric on  $\mathcal{X}$ .** As a natural choice of distance over  $\mathcal{X}$  we may consider  $L^2$ -difference  
 801 between pixel-value functions, or interpret pixel values as probability densities, and use  
 802 Wasserstein distance, or consider other ad-hoc image metrics.

803 **Group action: translations.** The group acting on our “pixel-value functions” is the  
 804 group of translations with elements from  $\mathbb{Z} \times \mathbb{Z}$ . We expect the following invariance for the  
 805 segmentation function  $f : \mathcal{X} \rightarrow \mathcal{X}$ :

$$f(v \cdot x) = v \cdot f(x),$$

806 where  $x \in \mathcal{X}$  represents an image with pixel values assigned to integer coordinates and  
 807  $v \in \mathbb{Z}^2$  is a translation vector and (in two alternative notations)  $v \cdot x = \tau_v(x)$  is the result of  
 808 translating all pixel values of  $x$  by  $v$ .

809 **Deformation properties of the action.** If we take the previously mentioned distance  
 810 functions on  $\mathcal{X}$  and the usual distance induced from  $\mathbb{R}^2$  over translation vectors  $v$ , it is easy  
 811 to verify that the assumptions of Theorem A.3 about the action of translations hold, and the  
 812 Lipschitz constants with respect to the metric on  $\mathcal{X}$  only depend on the mismatch near the  
 813 boundary, due to “zero pixels moving in” and to “interior pixels moving out” of our  $n \times n$   
 814 square, and being truncated. The ensuing bounds only depend on the precise distance that  
 815 we introduce use on  $\mathcal{X}$ .

816 **More realistic actions.** An alternative more realistic definition of  $\mathbb{Z} \times \mathbb{Z}$ -action consists  
 817 of defining  $v \cdot x$  as the truncation of  $\tau_v(x)$  where, for pixels outside our “relevant”  $n \times n$   
 818 square we set pixel value to 0 after the translation.

819 **Problems near the boundary.** Nevertheless, the updated translation action, will move  
 820 pixel values of 0, coming from pixels outside the  $n \times n$  square, and will create artificial zero  
 821 pixel values inside the image  $v \cdot x$ , different than the values that would be present in real  
 822 data.

823 **Imperfect equivariance of data.** Also, even in the latter more realistic alternative, the  
 824 above translation equivariance is not respecting by segmentation input-output pairs coming  
 825 from finite  $n \times n$  images, since, independently of  $n$ , the boundary pixel positions translated  
 826 by  $v$ , fall outside the original image.

827 **Approximate stabilizer.** In any case, we have to restrict the choices of  $v$  to integer-  
 828 coordinate elements of a (subset of a)  $n \times n$  square, containing only the translations that  
 829 are relating “real” segmentations that appear within our  $n \times n$  relevant window. It is thus

830 natural to restrict  $\text{Stab}_\epsilon$  to only include vectors in a smaller subset of  $\mathbb{Z} \times \mathbb{Z}$ , of cardinality

$$|\text{Stab}_\epsilon| \leq n^2.$$

831 The value of error  $\epsilon$  may quantify the allowed error (or noisiness) for our model sets.

832 **Reducing to finite  $G$  and computing  $\lambda$ .** For the sake of computing  $\lambda$  in our Theorem  
833 6.1, we can observe that input and output values outside the “padding perimeter” given by  
834 a  $(n + k - 1) \times (n + k - 1)$  square, are irrelevant, and thus we may actually periodize the  
835 images and consider the images as subsets of a *padded torus*  $(\mathbb{Z}/(n + k - 1)\mathbb{Z})^2$ , which we  
836 consider as acting on itself by translations. In this case  $G \simeq (\mathbb{Z}/(n + k - 1)\mathbb{Z})^2$ , so that

$$|G| = (n + k - 1)^2 \quad \text{and thus} \quad \lambda = \frac{|\text{Stab}_\epsilon|}{(n + k - 1)^2}.$$

837 **Further extensions.** In [25], it is argued that convolutional layers in classical CNNs are  
838 not fully translation-equivariant, and can encode positional information, due to the manner  
839 in which boundary padding is implemented. Possible solutions are increasing the padding to  
840 size  $k$  (so that the padded image is a square of size  $(n + 2k) \times (n + 2k)$ ) or extending images  
841 by periodicity, via so-called “circular padding” (which transforms each image into a space  
842 equivalent to the torus  $(\mathbb{Z}/n\mathbb{Z})^2$ ). In either case, the application of actions by translations  
843 by vectors that are too large compared to the image size of  $n \times n$ , will increase the mismatch  
844 between model equivariance and data equivariance.

845 **Stride and downsampling.** In [11], a different equivariance error for classical CNNs is  
846 studied, related to the use of stride  $> 1$  in order to lower the output dimensions of CNN layer  
847 outputs. If for example we use stride 2 when defining layer operation  $f : \mathcal{X} \rightarrow \mathcal{Y}$ , then  $\mathcal{Y}$  will  
848 have relevant pixel values only in an  $n/2 \times n/2$ -square, and we apply the  $k \times k$  convolution  
849 kernel only at positions with coordinates in  $(2\mathbb{Z}) \times (2\mathbb{Z})$  from image  $x$ . In this case we require  
850 that translations by group elements  $v \in (2\mathbb{Z}) \times (2\mathbb{Z})$  on  $x$  have the effect of a translation by  
851  $v/2 \in \mathbb{Z}$  on the output. However for shifts in the input via vectors  $v$  that do not have two  
852 even coordinates, we may not have an explicit corresponding action on the output, and  
853 in [11] a solution via adaptive polyphase sampling is proposed. A possibility for studying  
854 the best polyphase sampling strategy via almost equivariance, would be to include a bound  
855 for equivariance error  $\epsilon > 0$  and consider the optimization problem of finding the polyphase  
856 approximation that minimizes theoretical or empirical quantifications of  $\epsilon$ . As a benchmark  
857 (modelled on the case of infinite images without boundary effects) one could compare the  
858 above to the action via  $\text{Stab}_0 = (2\mathbb{Z}) \times (2\mathbb{Z})$  which has  $\lambda = 1/4$  within the ambient group  
859  $G = \mathbb{Z} \times \mathbb{Z}$ . Our Theorem 6.1 can be used to compare the effects of increasing or decreasing  
860  $\epsilon, \lambda$ , in terms of data symmetry.

## 861 B.2.2 Partial equivariance in GCNNs

862 In this section, we connect the main results from [38] to our setup. In [38], one of the main  
863 motivating examples was to consider rotations applied to a handwritten digit and revert  
864 them. The underlying group action was via  $SO(2)$  and only rotations of angles between  
865  $[-60^\circ, 60^\circ]$  were permitted in one case, which allowed to not confound rotated digits “3” and  
866 “9” for example.

867 The above task can be formulated on a space of functions  $f : \mathcal{X} \rightarrow \mathcal{Y}$  in which  $\mathcal{X}$  represents  
868 the space of possible images and  $\mathcal{Y}$  the labels. Elements  $(Y_d, Y_\theta) \in \mathcal{Y}$  include a digit  
869 classification label  $Y_d$  and a rotation angle value  $Y_\theta$ .

870 We consider actions by group  $G = SO(2) = \{R_\phi : \phi \in \mathbb{R}/360\mathbb{Z}\}$ , where  $R_\phi$  is the rotation  
871 matrix by angle  $\phi$ , and the group operation corresponds to summing the angles, modulo  
872  $360^\circ$  (or in radians, modulo  $2\pi$ ). The action of  $R_\phi$  over  $\mathcal{X}$  would be by rotation as usual  
873 ( $R_\theta$  sends image  $x \in \mathcal{X}$  to  $R_\theta \cdot x$ , now rotated by  $\theta$ ), and over  $\mathcal{Y}$  we consider the action by

$$R_\phi(Y_d, Y_\theta) = (Y_d, Y_\theta + \phi),$$

874 i.e. the restriction of the action on the digit label leaves it invariant and the restriction of  
875 the action on the angle label is non-trivial, giving a shift on the label.

876 The optimum labelling assigns to  $x$  a label  $y^*(x)$  enjoying precise equivariance under the  
877 above definitions of the actions, and thus we are allowed to permit equivariance error  $\epsilon = 0$ .  
878 However as mentioned above, applying rotations outside the range  $\theta \in [-60^\circ, 60^\circ]$  to the  
879 data would surely bring us outside the labelled data distribution, thus we are led to take

$$\epsilon = 0, \quad \text{Stab}_0 = \{R_\theta : \theta \in [-60^\circ, 60^\circ]\}.$$

880 We then have that  $|\text{Stab}_0|/|SO(2)| = 1/3$ , with respect to the natural Haar measure on  
881 rotations. It is natural to think of the set of  $\text{Stab}_0$ -action representatives of images  $\mathcal{X}_0^0$  given  
882 as the "unrotated" images. If we take a digit image that is rotated, say by  $20^\circ$ , from its  
883 "base" version, and we apply a rotation of  $50^\circ$  to it (i.e. an element of  $\text{Stab}_0$ ), then we reach  
884 the version of the image now excessively rotated by  $70^\circ$ . This means that without further  
885 modification, considering model symmetries with  $\text{Stab}_0$  taken to be independent of the point,  
886 would automatically generate some error when tested on the data. While decreasing the  
887 threshold angle in the definition of  $\text{Stab}_0$  from  $60^\circ$  would limit this effect, it will also decrease  
888 generalization error in the model. The study of point-dependent invariance sets  $\text{Stab}_\epsilon$  is  
889 interesting in view of this example application, but it is outside the scope of the current  
890 approximation/generalization bounds and is left for future work.

### 891 B.2.3 Possible applications to partial equivariance in Reinforcement Learning

892 The use of approximate invariances for RL applications was considered in [21, Sec. 6] via soft  
893 equivariance constraints allowing better generalization for an agent moving in a geometric  
894 environment. While imposing approximate equivariance for memoryless  $G$ -action for groups  
895 such as  $G = SO(2), \mathbb{Z}_2$  has produced positive results, it may be interesting, in analogy to  
896 the previous section, to include memory, and thus restrict the choices of group actions across  
897 time steps. Note that for a temporal evolution of  $T$  steps, the group action by  $G$  acting  
898 independently at each step would produce a  $T$ -interval action via the product group  $G^T$ ,  
899 and allowing for a partial action via  $\text{Stab}_\epsilon$ , with possibly increased fitness to evolving data.  
900 More precise time-dependence prescriptions and consequences within  $Q$ -learnig are left to  
901 future work.

## 902 C Discussion of [19]

903 In section 2 we mentioned [19] (reference [18] in the main file), which considers PAC-style  
904 bounds under model symmetry. [19] works with compact groups and argues how the learning  
905 problem in such a setup reduces to only working with a set of reduced orbit representatives,  
906 which leads to a generalization gain. This message of [19] is similar to ours, although we  
907 work with a more general setup. However, we noted that the main theorem in [19] has an  
908 error. Here, we briefly sketch the issue with the proof.

909 One of the main quantities of interest in the main theorem of [19] is  $D_\tau(\mathcal{X}, \mathcal{H})$  (notation  
910 from their paper), which directly comes from the following bound, and is claimed to have a  
911 linear dependence on  $Cov(\mathcal{X}, \rho, \delta)$ . Again, for the sake of easier verification, we follow their  
912 notation. Crucially, note that [19] uses the notation  $Cov$  as analogous to our  $\mathcal{N}$ :

$$Cov(\mathcal{H}, \|\cdot\|_{L_\infty}, 2C\delta + \kappa) \leq Cov(\mathcal{X}, \rho, \delta) \sup_{x \in \mathcal{X}} Cov(\mathcal{H}(x), \|\cdot\|_\infty, \kappa)$$

913 However, the correct application of the Kolmogorov-Tikhomirov estimate shows that the  
914 reasoning in the proof should yield a dependence which is exponential in  $Cov(\mathcal{X}, \rho, \delta)$ , not  
915 linear. To see this, set  $s = 2$  (sufficient for our purposes) in equation 238 in [52] (page 186).  
916 In other words, it is not possible to cover Lipschitz functions in infinity norm by only using  
917 constant functions.
